# Supplementary material for: Thermally stable phosphorus and nickel modified ZSM-5 zeolites for catalytic co-pyrolysis of biomass and plastics
Source: Royal Society of Chemistry journal article supplement (doi:10.1039/c5ra02947c), 2015-01-01
Supplement: c5ra02947c1.pdf [file c5ra02947c1.pdf]

Electronic Supplementary Information for:

**Thermally stable phosphorus and nickel modified ZSM-5 zeolites for  
catalytic co-pyrolysis of biomass and plastics**

Weikun Yao <sup>a,b</sup>, Jian Li <sup>a</sup>, Yu Feng <sup>a</sup>, Wei Wang <sup>a</sup>, Xianlong Zhang <sup>b</sup>, Qun Chen <sup>c</sup>,  
Sridhar Komarneni <sup>c</sup>, Yujue Wang <sup>a,\*</sup>

<sup>a</sup> School of Environment, State Key Joint Laboratory of Environmental Simulation  
and Pollution Control, Tsinghua University, Beijing 100084, China

<sup>b</sup> School of Chemistry and Chemical Engineering, Hefei University of Technology,  
Hefei 230009, China

<sup>c</sup> Key laboratory for Thermal Science and Power Engineering of Ministry of  
Education, Department of Thermal Engineering, Tsinghua University, Beijing  
100084, China

<sup>d</sup> Materials Research Institute, Materials Research Laboratory, The Pennsylvania State  
University, University Park, PA 16802, USA

\*Corresponding author at: School of Environment, Tsinghua University, Beijing  
100084, China. Telephone: 86-10-62772914; Fax: 86-10-62785687. E-mail address:  
wangyujue@tsinghua.edu.cn.

**1. Catalyst-to-reactant ratios used in catalytic fast pyrolysis processes**

CDS pyroprobes are commonly used in lab-scale CFP studies mainly to screen catalysts and investigate reaction mechanisms.<sup>1-4</sup> Because the reactors of CDS pyroprobes can hold only tiny amounts of samples (several micrograms), high catalyst-to-sample ratios (e.g., 10–20) are required to ensure that biomass- and plastic-derived volatile intermediates can then be effectively converted to final products (e.g., olefins and aromatic hydrocarbons) within the catalyst framework before the volatile

intermediates escape from the reactor.<sup>4-6</sup> It should be noted that the catalyst-to-reactant ratios used for CDS pyroprobe CFP tests are considerably higher than those used for industrial CFP processes. For example, some pilot-scale fluidized bed reactors have recently been developed for continuous CFP operations, in which biomass and catalysts are continuously added into and removed from the reactors.<sup>7-10</sup> The removed catalysts are then regenerated by burning off coke deposit in air and reused in subsequent CFP cycles. The catalyst-to-biomass ratio, which is defined as the ratio between catalyst and biomass feeding rates, is usually between 3 and 9 in these pilot-scale studies.<sup>7, 9, 10</sup>

## 2. Effects of phosphorus and nickel loading on CFP of pine wood and LDPE mixture

A series of phosphorus (P) and phosphorus/nickel (P/Ni) modified ZSM-5 zeolites were prepared by impregnation of a conventional ZSM-5 zeolite with P (1–3 wt.%) and subsequent Ni (1–3 wt.%). The actual P and Ni contents on the catalysts after calcination (i.e., before the catalysts were used for CFP tests) were measured by X-ray fluorescence (XRF) technique and shown in Table S1.

**Table S1**  
Phosphorus and nickel contents of the zeolites used in this study.

| Sample         | SiO <sub>2</sub> /Al <sub>2</sub> O <sub>3</sub> | Loading used in impregnation (wt.%) |    | Actual loading after calcination <sup>a</sup> (wt.%) |      |
|----------------|--------------------------------------------------|-------------------------------------|----|------------------------------------------------------|------|
|                |                                                  | P                                   | Ni | P                                                    | Ni   |
| ZSM-5          | 37.7                                             | -                                   | -  | -                                                    | -    |
| 1%P-ZSM-5      | 38.8                                             | 1                                   | -  | 0.91                                                 | -    |
| 2%P-ZSM-5      | 38.2                                             | 2                                   | -  | 1.54                                                 | -    |
| 3%P-ZSM-5      | 38.0                                             | 3                                   | -  | 3.03                                                 | -    |
| 5%P-ZSM-5      | 38.3                                             | 5                                   | -  | 4.96                                                 | -    |
| 3%P/1%Ni-ZSM-5 | 39.7                                             | 3                                   | 1  | 1.79                                                 | 1.05 |
| 3%P/2%Ni-ZSM-5 | 39.7                                             | 3                                   | 2  | 1.87                                                 | 1.96 |
| 3%P/3%Ni-ZSM-5 | 38.8                                             | 3                                   | 3  | 2.04                                                 | 3.07 |

<sup>a</sup> Measured by XRF analysis.

Fig. S1 shows that the aromatic yield in co-feed CFP of pine wood and LDPE mixture (mass ratio of 2) went through a maximum at a phosphorus (P) loading of 2 wt.%. Further increasing P loading over ZSM-5 to 5 wt.% resulted in a considerable decrease in the aromatic yield. This result indicates that ZSM-5 impregnation with appropriate amounts of P can improve aromatic production in co-feed CFP of biomass and LDPE. However, overloading P can cause significant decrease in the catalytic activity of ZSM-5 due to severe pore blockage and acidity decrease of the zeolites.<sup>11-13</sup>

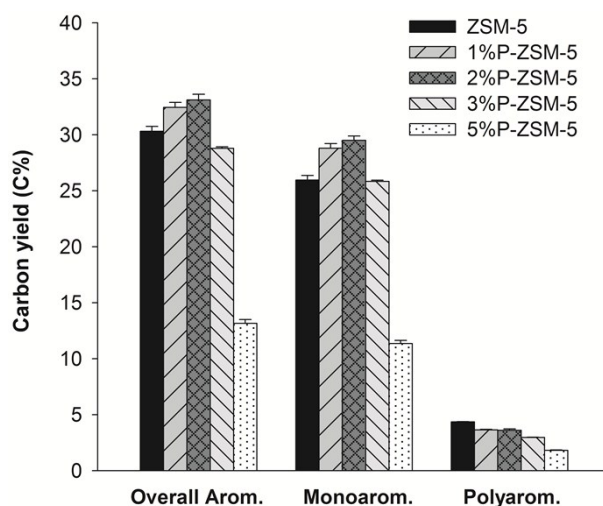

Fig. S1. Effects of phosphorus loading over P-ZSM-5 on aromatic production in co-feed catalytic fast pyrolysis of pine wood and LDPE mixture (mass ratio of 2).

Fig. S2 shows that subsequent impregnation of P-modified ZSM-5 zeolites with Ni can further enhance aromatic production in co-feed CFP. This improvement is probably because Ni modification can increase the dehydrogenation activity of zeolites, thus enhancing olefin transformation to aromatics.<sup>14, 15</sup> Among the P/Ni-ZSM-5 zeolites, ZSM-5 modified with 3 wt.% P and 2 wt.% Ni (3%P/2%Ni-ZSM-5) produced the highest aromatic yield, and was therefore selected for further characterization and CFP evaluations.

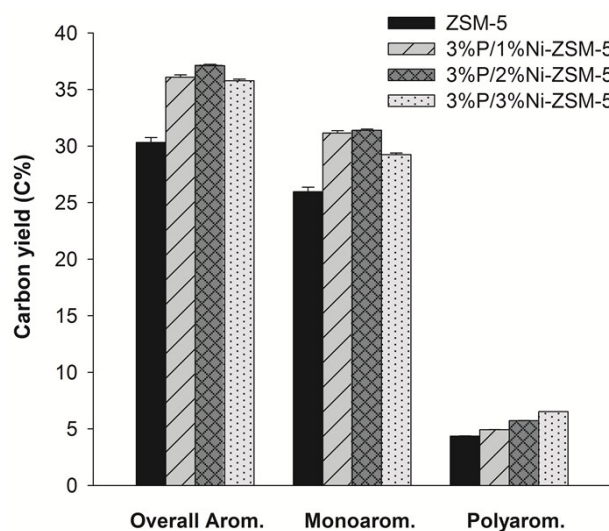

Fig. S2. Effects of phosphorus and nickel loading over P/Ni-ZSM-5 on aromatic production in co-feed catalytic fast pyrolysis of pine wood and LDPE mixture (mass ratio of 2).

## References

1. P. S. Rezaei, H. Shafaghat and W. M. A. W. Daud, *Applied Catalysis A: General*, 2014, **469**, 490-511.
2. C. Liu, H. Wang, A. M. Karim, J. Sun and Y. Wang, *Chem. Soc. Rev.*, 2014, **43**, 7594-7623.
3. X. Li, J. Li, G. Zhou, Y. Feng, Y. Wang, G. Yu, S. Deng, J. Huang and B. Wang, *Appl. Catal., A*, 2014, **481**, 173-182.
4. T. R. Carlson, J. Jae, Y.-C. Lin, G. A. Tompsett and G. W. Huber, *J. Catal.*, 2010, **270**, 110-124.
5. X. Y. Li, L. Su, Y. J. Wang, Y. Q. Yu, C. W. Wang, X. L. Li and Z. H. Wang, *Front. Env. Sci. Eng.*, 2012, **6**, 295-303.
6. C. Torri, M. Reinikainen, C. Lindfors, D. Fabbri, A. Oasmaa and E. Kuoppala, *J. Anal. Appl. Pyrolysis*, 2010, **88**, 7-13.
7. V. Paasikallio, C. Lindfors, E. Kuoppala, Y. Solantausta, A. Oasmaa, J. Lehto and J. Lehtonen, *Green Chem.*, 2014, **16**, 3549-3559.
8. P. U. Karanjkar, R. J. Coolman, G. W. Huber, M. T. Blatnik, S. Almalkie, S. M. de Bruyn Kops, T. J. Mountziaris and W. C. Conner, *AIChE J.*, 2014, **60**, 1320-1335.
9. J. Jae, R. Coolman, T. J. Mountziaris and G. W. Huber, *Chem. Eng. Sci.*, 2014, **108**, 33-46.
10. G. Yildiz, M. Pronk, M. Djokic, K. M. van Geem, F. Ronsse, R. van Duren and W. Prins, *J. Anal. Appl. Pyrolysis*, 2013, **103**, 343-351.
11. G. Jiang, L. Zhang, Z. Zhao, X. Zhou, A. Duan, C. Xu, J. Gao, *Appl. Catal., A*, 2008, **340**, 176-182.
12. H.L. Janardhan, G.V. Shanbhag, A.B. Halgeri, *Appl. Catal., A*, 2014, **471**, 12-18.
13. G. Zhao, J. Teng, Z. Xie, W. Jin, W. Yang, Q. Chen, Y. Tang, *J. Catal.*, 2007, **248**, 29-37.
14. E.F. Iliopoulou, S.D. Stefanidis, K.G. Kalogiannis, A. Delimitis, A.A. Lappas, K.S. Triantafyllidis, *Appl. Catal., B*, 2012, **127**, 281-290.
15. B. Valle, A.G. Gayubo, A.s.T. Aguayo, M. Olazar, J. Bilbao, *Energy Fuels*, 2010, **24**, 2060-2070.
